# Supplementary material for: Blocking key mutated hotspot residues in the RBD of the omicron variant (B.1.1.529) with medicinal compounds to disrupt the RBD-hACE2 complex using molecular screening and simulation approaches
Source: Royal Society of Chemistry journal article supplement (doi:10.1039/d2ra00277a), 2022-01-01
Supplement: d2ra00277a1.pdf [file d2ra00277a1.pdf]

1 **Supplementary Materials**

2 **Blocking the Key Mutated hotspot residues in the RBD of Omicron variant**  
3 **(B.1.1.529) with medicinal compounds to disrupt the RBD-hACE2 complex**  
4 **using Molecular screening and Simulation approach**

5 Abbas Khan<sup>1\*</sup>, AsfandYar Waheed Randhawa<sup>2</sup>, Ali Raza Balouch<sup>2</sup>, Naila Mukhtar<sup>3</sup>, Abrar  
6 Mohammad Sayaf<sup>4</sup>, Muhammad Suleman<sup>5</sup>, Taimoor Khan<sup>1</sup>, Shahid Ali<sup>5</sup>, Syed, Shujait Ali<sup>5</sup>,  
7 Yanjing Wang<sup>6\*</sup>, Anwar Mohammad<sup>7</sup>, Dong-Qing Wei<sup>1,8,9\*</sup>

8 <sup>1</sup>Department of Bioinformatics and Biological Statistics, School of Life Sciences and  
9 Biotechnology, Shanghai Jiao Tong University, Shanghai, 200240, P.R. China.

10 <sup>2</sup>Central Park Medical College, Lahore.

11 <sup>3</sup>Department of Botany, University of Okara, Punjab, Pakistan.

12 <sup>4</sup>Department of Chemistry, University of Swat, Kanju, Khyber Pakhtunkhwa, Pakistan.

13 <sup>5</sup>Centre for Biotechnology and Microbiology, University of Swat, Kanju, Khyber Pakhtunkhwa,  
14 Pakistan.

15 <sup>6</sup>Engineering Research Center of Cell and Therapeutics Antibody, School of Pharmacy, Shanghai  
16 Jiao Tong University, Shanghai, 200240, P.R. China.

17 <sup>7</sup>Department of Biochemistry and Molecular Biology, Dasman Diabetes Insitutue, Dasman,  
18 Kuwait.

19 <sup>8</sup>State Key Laboratory of Microbial Metabolism, Shanghai-Islamabad-Belgrade Joint Innovation  
20 Center on Antibacterial Resistances, Joint Laboratory of International Laboratory of Metabolic  
21 and Developmental Sciences, Ministry of Education and School of Life Sciences and  
22 Biotechnology, Shanghai Jiao Tong University, Shanghai 200030, P.R. China.

23 <sup>9</sup>Peng Cheng Laboratory, Vanke Cloud City Phase I Building 8, Xili Street, Nashan District,  
24 Shenzhen, Guangdong, 518055, P.R China.

25  
26 ***\*Corresponding Authors***

27

28

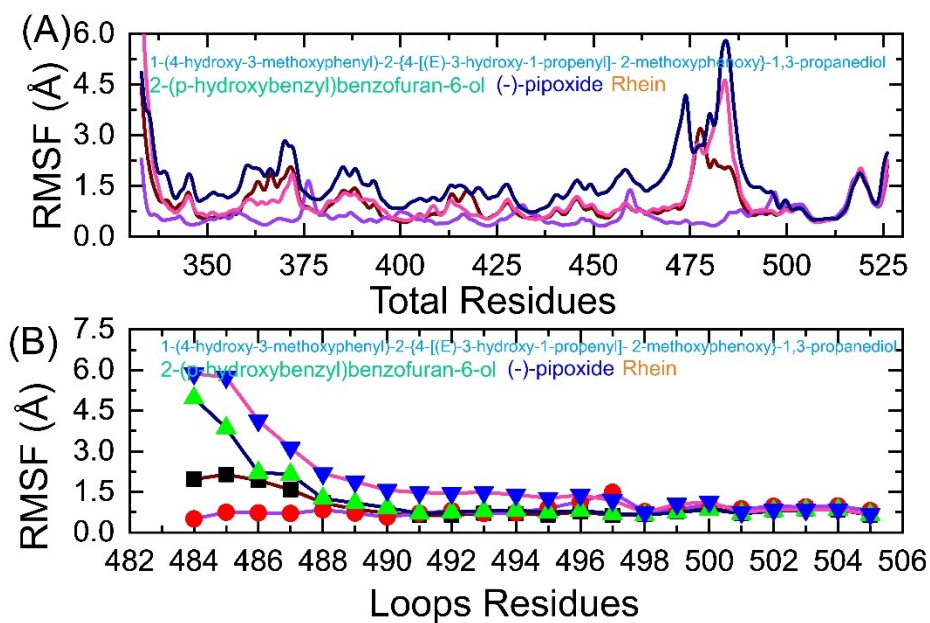

29  
 30 **Figure S1:** RMSF analysis of the top complexes replica 2. (A) Whole structure RMSF, (B) loop  
 31 residues RMSF.

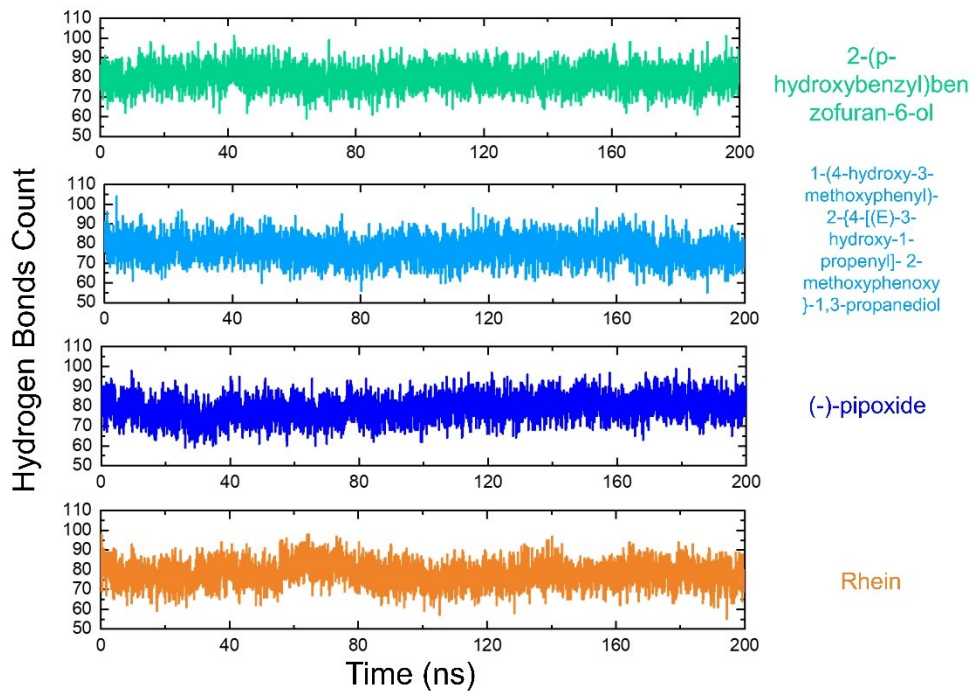

32  
 33 **Figure S2:** Hydrogen bonding analysis of the top complexes replica 2.  
 34
